# Supplementary material for: Incidences of Involuntary Psychiatric Detentions in 25 U.S. States
Source: Atypon-hosted journal article supplement (doi:10.1176/appi.ps.201900477), 2020-11-03
Supplement: appi.ps.201900477.ds001.pdf [file appi.ps.201900477.ds001.pdf]

## Online Supplement

Lee G, Cohen D. Incidences of involuntary psychiatric detentions in 25 US states.  
*Psychiatric Services*. Revised April 25, 2020.

**Table 1.** Topics and countries from results of Pubmed query using the search term " 'Commitment of the Mentally Ill/statistics and numerical data' [MeSH]", from inception to November 11, 2019, no language restriction (n=594)

**Table 2.** Annual Counts of Involuntary Psychiatric Detentions, 25 States, 2011-2018

**Table 3.** Terms and Data Sources

This supplementary material has been provided by the authors to give readers additional information about their work.

**Table 1:** Topics and countries of results of Pubmed query using the single search term " 'Commitment of the Mentally Ill/statistics and numerical data' [MeSH]", from inception to November 11, 2019, no language restriction (n=594)

| Topics                                                                                                                    | United States |      | Other countries <sup>a</sup> |      |
|---------------------------------------------------------------------------------------------------------------------------|---------------|------|------------------------------|------|
|                                                                                                                           | n             | %    | n                            | %    |
| Reports on involuntary civil psychiatric detention, admission, or inpatient commitment                                    |               |      |                              |      |
| Incidence, prevalence                                                                                                     | 10            | 10.6 | 95                           | 19.3 |
| Features of commitment process                                                                                            | 10            | 11.1 | 25                           | 5.1  |
| Predictors of involuntary status                                                                                          | 6             | 5.9  | 20                           | 4.1  |
| Clinical, sociodemographic characteristics of involuntary samples                                                         | 3             | 1.4  | 50                           | 10.2 |
| Comparison of involuntary and voluntary samples                                                                           | 3             | 2.8  | 22                           | 4.5  |
| Alternatives to, interventions targeting, commitment                                                                      | 0             |      | 10                           | 2.0  |
| Stakeholder attitudes; perceived coercion                                                                                 | 0             |      | 13                           | 2.6  |
| Reports on related topics                                                                                                 |               |      |                              |      |
| Forensic/criminal commitment, detention, liberation; insane acquitted, not guilty by reason of insanity; sexual offenders | 19            | 18.6 | 48                           | 9.8  |
| Outpatient commitment, community treatment orders                                                                         | 8             | 7.8  | 19                           | 3.9  |
| Aggression; restraint and seclusion; absconding                                                                           | 5             | 4.9  | 18                           | 3.7  |
| Psychiatric hospitalization in general                                                                                    | 5             | 4.9  | 40                           | 8.2  |
| Comments, replies, reviews about any of above topics                                                                      | 12            | 11.8 | 54                           | 11.0 |
| Other, unrelated, undetermined                                                                                            | 21            | 20.6 | 76                           | 15.5 |
| Total                                                                                                                     | 102           | 100  | 490                          | 100  |

Notes to Table. Both authors coded topics and countries by inspecting title, abstract, citation, and/or full text. Totals sum to 592 as countries for 2 publications could not be determined. a. Other countries include, in top 10 ranks: United Kingdom (n=116), Germany (n=45), Denmark (n=37), Netherlands (n=35), Australia (n=28), Norway (n=24), Canada (n=22), Sweden and France (n=16 each), Israel (n=15), Italy (n=14).

**Table 2:** Annual counts of involuntary psychiatric detentions, 25 states, 2011-2018

| State and description/definition of count          | Year    |         |         |         |         |         |         |       |
|----------------------------------------------------|---------|---------|---------|---------|---------|---------|---------|-------|
|                                                    | 2011    | 2012    | 2013    | 2014    | 2015    | 2016    | 2017    | 2018  |
| <b>Alaska</b>                                      |         |         |         |         |         |         |         |       |
| Commitment proceedings                             | 2,124   | 2,249   | 2,579   | 2,599   | 2,702   | 2,827   | 3,006   | 3,285 |
| % change from previous year                        |         | 5.9     | 14.7    | 0.8     | 4.0     | 4.6     | 6.3     | 9.3   |
| % change 2011-2018                                 | 54.6    |         |         |         |         |         |         |       |
| <b>Arkansas</b>                                    |         |         |         |         |         |         |         |       |
| Alcoholic and civil commitment                     | 2,623   | 2,696   | 2,735   | 2,678   | 2,672   | 2,617   | 2,819   | 2,535 |
| % change from previous year                        |         | 2.8     | 1.4     | -2.1    | -0.2    | -2.1    | 7.7     | -10.1 |
| % change 2011-2018                                 | -3.3    |         |         |         |         |         |         |       |
| <b>California</b>                                  |         |         |         |         |         |         |         |       |
| Adult 72-hour evaluation and treatment (emergency) | 133,913 | 109,583 | 139,048 | 144,397 | 89,514  | 136,874 | 136,116 |       |
| Minor 72-hour evaluation and treatment (emergency) | 19,960  | 16,115  | 23,787  | 23,215  | 12,992  | 18,627  | 21,679  |       |
| Total Adult and Minor                              | 153,873 | 125,698 | 162,835 | 167,612 | 102,506 | 155,501 | 154,795 |       |
| % change from previous year                        |         | -18.3   | 29.5    | 2.9     | -38.8   | 51.7    | 1.5     |       |
| % change 2011-2017                                 | 0.6     |         |         |         |         |         |         |       |
| Adult & minor >14-day treatment (longer-term)      | 73,400  | 55,625  | 77,990  | 78,357  | 29,508  | 59,809  | 55,230  |       |
| % change from previous year                        |         | -24.2   | 40.2    | 0.5     | -62.3   | 102.7   | -7.6    |       |

| State and description/definition of count                | Year   |        |        |        |        |        |       |      |
|----------------------------------------------------------|--------|--------|--------|--------|--------|--------|-------|------|
|                                                          | 2011   | 2012   | 2013   | 2014   | 2015   | 2016   | 2017  | 2018 |
| <i>% change 2011-2017</i>                                | -24.7  |        |        |        |        |        |       |      |
| <b>Colorado</b>                                          |        |        |        |        |        |        |       |      |
| Adult 72-hour hold (emergency) [persons]                 |        |        | 25,680 | 28,234 | 24,561 | 26,910 |       |      |
| Minor 72-hour hold (emergency) [persons]                 |        |        | 5,637  | 7,058  | 5,030  | 8,038  |       |      |
| Adult & minor 72-hour hold (emergency) [events]          | 20,819 | 28,375 | 35,469 | 39,384 | 32,259 | 39,271 |       |      |
| <i>% change from previous year</i>                       |        | 36.3   | 25.0   | 11.0   | -18.0  | 21.6   |       |      |
| <i>% change 2011-2016</i>                                | 88.6   |        |        |        |        |        |       |      |
| Adult certification (longer-term) [persons]              |        |        | 3,773  | 3,771  | 2,822  | 3,931  |       |      |
| Minor certification (longer-term) [persons]              |        |        | 77     | 117    | 58     | 80     |       |      |
| Adult & minor certification (longer-term) [events]       | 3,933  | 4,274  | 4,687  | 4,847  | 3,820  | 4,904  |       |      |
| <i>% change from previous year</i>                       |        | 8.7    | 9.7    | 3.4    | -21.1  | 28.4   |       |      |
| <i>% change 2011-2016</i>                                | 24.7   |        |        |        |        |        |       |      |
| <b>Connecticut</b>                                       |        |        |        |        |        |        |       |      |
| Adult alcohol/drug dependency and involuntary commitment |        | 1,097  | 1,152  | 1,085  | 1,024  | 1,100  | 1,102 |      |
| Minor involuntary commitment                             |        | 13     | 8      | 10     | 3      | 4      | 3     |      |
| Total Adult and Minor                                    |        | 1,110  | 1,160  | 1,095  | 1,027  | 1,104  | 1,105 |      |
| <i>% change from previous year</i>                       |        |        | 4.5    | -5.6   | -6.2   | 7.5    | 0.1   |      |



| State and description/definition of count                         | Year   |        |        |        |        |        |        |        |
|-------------------------------------------------------------------|--------|--------|--------|--------|--------|--------|--------|--------|
|                                                                   | 2011   | 2012   | 2013   | 2014   | 2015   | 2016   | 2017   | 2018   |
| 12(a) arrivals [persons]                                          | 46,246 | 46,728 | 48,591 | 45,908 | 47,064 | 45,216 | 47,043 | 50,459 |
| % change from previous year                                       |        | 0.1    | 5.0    | -5.5   | 2.5    | 3.9    | 4.0    | 7.3    |
| <i>% change 2011-2018</i>                                         | 9.1    |        |        |        |        |        |        |        |
| <b>Michigan</b>                                                   |        |        |        |        |        |        |        |        |
| Mental commitments                                                | 16,339 | 16,991 | 17,017 | 17,172 | 17,306 | 16,946 | 17,065 | 19,338 |
| % change from previous year                                       |        | 4.0    | 0.2    | 0.9    | 0.8    | -2.1   | 0.7    | 13.3   |
| <i>% change 2011-2018</i>                                         | 18.3   |        |        |        |        |        |        |        |
| <b>Missouri</b>                                                   |        |        |        |        |        |        |        |        |
| 96 hours detention for mental health and alcohol/drug (emergency) | 11,857 | 11,862 | 12,695 | 11,946 | 12,117 | 12,580 | 13,107 | 14,357 |
| % change from previous year                                       |        | 0.0    | 6.7    | -5.6   | 1.4    | 3.8    | 4.2    | 9.5    |
| <i>% change 2011-2018</i>                                         | 21.1   |        |        |        |        |        |        |        |
| >21 day mental health and alcohol/drug treatment (longer-term)    | 1,503  | 1,321  | 1,502  | 1,647  | 1,693  | 1,681  | 1,868  | 1,853  |
| % change from previous year                                       |        | -12.1  | 13.7   | 9.6    | 2.8    | -0.7   | 11.1   | -0.8   |
| <i>% change 2011-2018</i>                                         | 23.3   |        |        |        |        |        |        |        |
| <b>Montana</b>                                                    |        |        |        |        |        |        |        |        |
| Commitment                                                        | 1,239  | 1,230  | 1,240  | 1,213  | 1,295  | 1,344  | 1,237  | 1,166  |
| % change from previous year                                       |        | -0.7   | 0.8    | -2.2   | 6.8    | 3.8    | -8.0   | -5.7   |
| <i>% change 2011-2018</i>                                         | -5.9   |        |        |        |        |        |        |        |







| State and description/definition of count      | Year   |        |        |        |        |        |        |      |
|------------------------------------------------|--------|--------|--------|--------|--------|--------|--------|------|
|                                                | 2011   | 2012   | 2013   | 2014   | 2015   | 2016   | 2017   | 2018 |
| Emergency admissions (emergency) [events]      | 450    | 450    | 422    | 391    | 445    | 450    | 435    | 500  |
| % change from previous year                    |        | 0.0    | -6.2   | -7.3   | 13.8   | 1.1    | -3.3   | 14.9 |
| % change 2012-2018                             | 11.1   |        |        |        |        |        |        |      |
| Involuntary admissions (longer-term) [persons] |        |        | 460    | 423    | 485    | 481    | 477    | 537  |
| % change from previous year                    |        |        |        | -8.0   | 14.6   | -0.8   | -0.8   | 12.6 |
| % change 2013-2018                             | 16.7   |        |        |        |        |        |        |      |
| <b>Virginia</b>                                |        |        |        |        |        |        |        |      |
| Adult temporary detention (emergency)          | 20,420 | 20,059 | 19,971 | 21,055 | 22,804 | 23,745 |        |      |
| Minor temporary detention (emergency)          | 1,879  | 1,647  | 1,643  | 1,857  | 2,208  |        |        |      |
| Total Adult and Minor                          | 22,299 | 21,706 | 21,614 | 22,912 | 25,012 |        |        |      |
| % change from previous year                    |        | -2.7   | -0.4   | 6.0    | 9.2    |        |        |      |
| % change 2011-2015                             | 12.2   |        |        |        |        |        |        |      |
| Adult involuntary commitment (longer-term)     | 12,407 | 12,310 | 12,288 | 13,392 | 13,176 | 13,735 | 14,054 |      |
| % change from previous year                    |        | -0.8   | -0.2   | 9.0    | -1.6   | 4.2    | 2.3    |      |
| % change 2011-2017                             | 13.3   |        |        |        |        |        |        |      |
| <b>Washington</b>                              |        |        |        |        |        |        |        |      |
| 72 hour detention (emergency)                  | 8,793  | 8,685  | 9,231  | 9,205  |        |        |        |      |
| % change from previous year                    |        | -1.2   | 6.3    | -0.3   |        |        |        |      |

| State and description/definition of count   | Year   |        |        |        |        |        |        |        |
|---------------------------------------------|--------|--------|--------|--------|--------|--------|--------|--------|
|                                             | 2011   | 2012   | 2013   | 2014   | 2015   | 2016   | 2017   | 2018   |
| <i>% change 2011-2014</i>                   | 4.7    |        |        |        |        |        |        |        |
| 14 day inpatient commitment (longer-term)   | 4,144  | 4,200  | 4,648  | 4,549  |        |        |        |        |
| % change from previous year                 |        | 1.3    | 10.7   | -2.1   |        |        |        |        |
| <i>% change 2011-2014</i>                   | 9.8    |        |        |        |        |        |        |        |
| <b>Wisconsin</b>                            |        |        |        |        |        |        |        |        |
| Adult mental, alcohol, and drug commitments | 15,891 | 14,982 | 13,414 | 12,496 | 12,056 | 10,727 | 10,215 | 9,793  |
| Minor commitments                           | 162    | 363    | 427    | 527    | 520    | 516    | 641    | 693    |
| Total Adult and Minor                       | 16,053 | 15,345 | 13,841 | 13,023 | 12,576 | 11,243 | 10,856 | 10,486 |
| % change from previous year                 |        | -4.4   | -9.8   | -5.9   | -3.4   | -10.6  | -3.4   | -3.4   |
| <i>% change 2011-2017</i>                   | -34.7  |        |        |        |        |        |        |        |

**Table 3:** Terms and data sources

| State      | Terms for detention and/or commitment procedures given by data source, and classification into "Emergency" or "Longer-term commitment" if available                                                                                             | Data source, URL, notes                                                                                                                                                                                                                                                                                                                                                                                                                                                                                                                              | Date last accessed |
|------------|-------------------------------------------------------------------------------------------------------------------------------------------------------------------------------------------------------------------------------------------------|------------------------------------------------------------------------------------------------------------------------------------------------------------------------------------------------------------------------------------------------------------------------------------------------------------------------------------------------------------------------------------------------------------------------------------------------------------------------------------------------------------------------------------------------------|--------------------|
| Alaska     | "Filings" of "commitment proceedings" in superior courts                                                                                                                                                                                        | Alaska Court System Annual Report. Fiscal years 2011 to 2018. Alaska Court System Administrative Office.<br><a href="http://www.courts.alaska.gov/admin/index.htm#annualrep">http://www.courts.alaska.gov/admin/index.htm#annualrep</a>                                                                                                                                                                                                                                                                                                              | 8-31-2019          |
| Arkansas   | "Filings" of "alcoholic commitment" and "civil commitment" cases in circuit courts                                                                                                                                                              | Arkansas Judiciary Annual Summary. Calendar years 2011 to 2018, Office of Research and Justice Statistics - Arkansas Judiciary.<br><a href="https://public.tableau.com/profile/orjs.arcourts#!/vizhome/AR_Annual_Summary_Public_0/Dashboard1">https://public.tableau.com/profile/orjs.arcourts#!/vizhome/AR_Annual_Summary_Public_0/Dashboard1</a>                                                                                                                                                                                                   | 11-22-2019         |
| California | <u>Emergency</u> : "72-hour evaluation and treatment" at public or private mental health facilities<br><u>Longer-term commitment</u> : "14-day treatment," "additional 14-day treatment," "30-day treatment," and "additional 30-day treatment" | California Involuntary Detentions Data Reports. Fiscal years 2011 to 2017. California Department of Health Care Services. Mental Health and Substance Use Disorder Services Division.<br><a href="http://www.dhcs.ca.gov/services/MH/Pages/InvoluntaryDetention-MH.aspx">http://www.dhcs.ca.gov/services/MH/Pages/InvoluntaryDetention-MH.aspx</a><br><br>Reports state that data are collected from each county mental health department and public and private facilities that provide evaluation and treatment within each county. Data from some | 1-9-2020           |

| State       | Terms for detention and/or commitment procedures given by data source, and classification into "Emergency" or "Longer-term commitment" if available                                                                                                                                                                                                                                                                                                                         | Data source, URL, notes                                                                                                                                                                                                                                                                                                                                                                                                                                                                                                                                                                    | Date last accessed |
|-------------|-----------------------------------------------------------------------------------------------------------------------------------------------------------------------------------------------------------------------------------------------------------------------------------------------------------------------------------------------------------------------------------------------------------------------------------------------------------------------------|--------------------------------------------------------------------------------------------------------------------------------------------------------------------------------------------------------------------------------------------------------------------------------------------------------------------------------------------------------------------------------------------------------------------------------------------------------------------------------------------------------------------------------------------------------------------------------------------|--------------------|
|             |                                                                                                                                                                                                                                                                                                                                                                                                                                                                             | counties (not named) are missing.                                                                                                                                                                                                                                                                                                                                                                                                                                                                                                                                                          |                    |
| Colorado    | <p><u>Emergency</u>: "72-hour hold" in designated mental health facilities</p> <p><u>Longer-term commitment</u>: "Certification" includes "short-term" (not more than 3 months), "extended short-term" (can last an additional 3 months after the initial short-term), "long-term" (cannot exceed 6 months after short-term and extended short-term), and "extended long-term" (can last an additional 6 months after long-term) in designated mental health facilities</p> | <p>A Profile of the State of Colorado's Care and Treatment of People with Mental Illness: Title 27, Article 65 (C.R.S. 27-65-101 et seq.). Fiscal years 2011 to 2016. Colorado Department of Human Services (CDHS), Office of Behavioral Health. <a href="https://www.colorado.gov/pacific/cdhs/publications-reports">https://www.colorado.gov/pacific/cdhs/publications-reports</a></p> <p>Reports state that data are collected by the Office of Behavioral Health from all facilities licensed to provide "rights-restricted procedures involving individuals with mental illness."</p> | 2-12-2020          |
| Connecticut | Cases of "alcohol and drug dependency commitment" and "involuntary commitment" filed in probate courts                                                                                                                                                                                                                                                                                                                                                                      | <p>Connecticut Probate Courts Biennial Report. Fiscal years 2012 to 2017. Office of the Probate Court Administrator State of Connecticut. <a href="http://www.ctprobate.gov/Pages/Annual-Reports.aspx">http://www.ctprobate.gov/Pages/Annual-Reports.aspx</a></p> <p>Counts on commitment of minors reported from this</p>                                                                                                                                                                                                                                                                 | 1-9-2020           |

| State    | Terms for detention and/or commitment procedures given by data source, and classification into "Emergency" or "Longer-term commitment" if available | Data source, URL, notes                                                                                                                                                                                                                                                                                                                                                                                                                                                                                                                                                                                                                                                                                                                                                                                                               | Date last accessed |
|----------|-----------------------------------------------------------------------------------------------------------------------------------------------------|---------------------------------------------------------------------------------------------------------------------------------------------------------------------------------------------------------------------------------------------------------------------------------------------------------------------------------------------------------------------------------------------------------------------------------------------------------------------------------------------------------------------------------------------------------------------------------------------------------------------------------------------------------------------------------------------------------------------------------------------------------------------------------------------------------------------------------------|--------------------|
|          |                                                                                                                                                     | source were less than 15 throughout the study interval and were not considered separately but included in whole population totals.                                                                                                                                                                                                                                                                                                                                                                                                                                                                                                                                                                                                                                                                                                    |                    |
| Delaware | "Filings" of "involuntary commitments" cases in superior courts                                                                                     | Annual Report and Statistical Information for the Delaware Judiciary. Fiscal years 2011 to 2018. Administrative Office of the Courts.<br><a href="https://courts.delaware.gov/aoc/annualreports/fy18">https://courts.delaware.gov/aoc/annualreports/fy18</a>                                                                                                                                                                                                                                                                                                                                                                                                                                                                                                                                                                          | 11-22-2019         |
| Florida  | "Involuntary examination" (72 hours) in public and private facilities                                                                               | Christy A, Guenther C, Jenkins K, Ringhoff D, Rhode S: The Baker Act, The Florida Mental Health Act, Fiscal Year 2017/2018 Annual Report. Baker Act Reporting Center, Louis de la Parte Florida Mental Health Institute, Department of Mental Health Law and Policy, University of South Florida.<br><a href="https://www.usf.edu/cbcs/baker-act/documents/ba_usf_annual_report_2017_2018.pdf">https://www.usf.edu/cbcs/baker-act/documents/ba_usf_annual_report_2017_2018.pdf</a><br><br>This source calculates slightly higher age-specific population rates (e.g., 1005/100,000 all ages emergency detentions) than the present study (e.g., 966/100,000) because the source's population denominators were obtained from the Florida Office of Economic and Demographic Research, while this study's from the U.S. Census Bureau. | 11-22-2019         |

| State         | Terms for detention and/or commitment procedures given by data source, and classification into "Emergency" or "Longer-term commitment" if available                                                                                                                            | Data source, URL, notes                                                                                                                                                                                                                                                                                                                                                                                                                                                                                                                                  | Date last accessed |
|---------------|--------------------------------------------------------------------------------------------------------------------------------------------------------------------------------------------------------------------------------------------------------------------------------|----------------------------------------------------------------------------------------------------------------------------------------------------------------------------------------------------------------------------------------------------------------------------------------------------------------------------------------------------------------------------------------------------------------------------------------------------------------------------------------------------------------------------------------------------------|--------------------|
| Idaho         | "24-hr requests for civil commitments" received by the Idaho Department of Health and Welfare                                                                                                                                                                                  | Makin DA, Bernat FP, Lyons JA. Who decides civil commitment? A statewide analysis of initial hold requests. <i>Vict Offend</i> 2018; 13(8):1171-1192. <a href="https://doi.org/10.1080/15564886.2018.1509037">https://doi.org/10.1080/15564886.2018.1509037</a>                                                                                                                                                                                                                                                                                          | Not applicable     |
| Indiana       | Cases of "mental health" ("Proceedings involving mental health commitments, including temporary commitments, an extension of temporary commitment, regular commitment, or termination of a commitment are filed under this category") in circuit, superior, and probate courts | Indiana Judicial Service Report. 2018 Judicial Year in Review. Years 2011 to 2018. The Supreme Court of Indiana. <a href="https://www.in.gov/judiciary/iocs/files/rpts-ijrs-2018-judicial-review.pdf">https://www.in.gov/judiciary/iocs/files/rpts-ijrs-2018-judicial-review.pdf</a>                                                                                                                                                                                                                                                                     | 1-09-2020          |
| Massachusetts | "12(a) arrivals" ("2-hour involuntary examination") in designated mental health facilities                                                                                                                                                                                     | Report on the Impact of Chapter 249 of the Acts of 2000: An Act to Reform the Civil Commitment Process for Persons with Mental Illness. Calendar years 2011 to 2018. Massachusetts Department of Mental Health. <a href="http://www.mass.gov/service-details/civil-commitment-reports">http://www.mass.gov/service-details/civil-commitment-reports</a><br><br>Reports state that data are collected from 60 general and psychiatric hospitals licensed by the Massachusetts Department of Mental Health and from state-operated community mental health | 8-31-2019          |

| State    | Terms for detention and/or commitment procedures given by data source, and classification into "Emergency" or "Longer-term commitment" if available                                                                                                                                                                                                   | Data source, URL, notes                                                                                                                                                                                                                                                                                                                                                                                   | Date last accessed |
|----------|-------------------------------------------------------------------------------------------------------------------------------------------------------------------------------------------------------------------------------------------------------------------------------------------------------------------------------------------------------|-----------------------------------------------------------------------------------------------------------------------------------------------------------------------------------------------------------------------------------------------------------------------------------------------------------------------------------------------------------------------------------------------------------|--------------------|
|          |                                                                                                                                                                                                                                                                                                                                                       | centers with inpatient units.                                                                                                                                                                                                                                                                                                                                                                             |                    |
| Michigan | Filings of "mental commitments" in circuit courts                                                                                                                                                                                                                                                                                                     | Caseload Reports. Statewide. Statewide Circuit Court Summary. Calendar years 2011 to 2018, Michigan Courts.<br><a href="https://courts.michigan.gov/education/stats/caseload/pages/default.aspx">https://courts.michigan.gov/education/stats/caseload/pages/default.aspx</a><br><br>Counts calculated by subtracting "reopened" cases of "mental commitments" from "new filings" of "mental commitments." | 9-1-2019           |
| Missouri | <u>Emergency</u> : "Applications" of "96 hours detention" filed for "alcohol/drug" and "mental health" in circuit courts<br><u>Longer-term commitment</u> : "Petitions" filed for "21 day mental health," "90 day mental health," "180 day mental health," "1 year mental health," "30 day alcohol/drug," and "90 day alcohol/drug" in circuit courts | Table 43 - 46, Probate, Mental Health and Non-case Type: Probate Petitions Filed and Disposed. Mental Health and Non-Case Types Filed. Fiscal years 2011 to 2018. Missouri Judicial Courts Judicial Branch of Government.<br><a href="https://www.courts.mo.gov/page.jsp?id=137407">https://www.courts.mo.gov/page.jsp?id=137407</a>                                                                      | 9-7-2019           |
| Montana  | "New case filings and reopened cases" of "commitment" in district courts                                                                                                                                                                                                                                                                              | Case Filings and Dispositions. District Court Performance Measures/Statistics. Years 2011 to 2018. Montana Judicial Branch.<br><a href="https://courts.mt.gov/courts/statistics">https://courts.mt.gov/courts/statistics</a>                                                                                                                                                                              | 9-1-2019           |

| State         | Terms for detention and/or commitment procedures given by data source, and classification into "Emergency" or "Longer-term commitment" if available                                                                                                                   | Data source, URL, notes                                                                                                                                                                                                                                                                                                                                                                                                                 | Date last accessed |
|---------------|-----------------------------------------------------------------------------------------------------------------------------------------------------------------------------------------------------------------------------------------------------------------------|-----------------------------------------------------------------------------------------------------------------------------------------------------------------------------------------------------------------------------------------------------------------------------------------------------------------------------------------------------------------------------------------------------------------------------------------|--------------------|
| New Hampshire | "New filings" of "emergency admissions" in the district division and "involuntary admissions" in the probate division of circuit courts                                                                                                                               | 2011-2018 Circuit Court Filings by Division. Calendar years 2011 to 2018. New Hampshire Judicial Branch.<br><a href="https://www.courts.state.nh.us/cio/data-and-reports.htm#periodically-header">https://www.courts.state.nh.us/cio/data-and-reports.htm#periodically-header</a>                                                                                                                                                       | 9-7-2019           |
| Nevada        | "Filings" of civil "mental health cases": "Cases that deal with legal determination as to whether an individual is mentally ill or incompetent and should be placed or remain in care, custody, or treatment." Separate from "Mental competency" cases, not included. | Nevada Judiciary Annual Reports. Appendix Tables. Fiscal years 2011-2018. Family Caseloads.<br><a href="https://nvcourts.gov/Supreme/Reports/Annual_Reports/2018_Annual_Report/">https://nvcourts.gov/Supreme/Reports/Annual_Reports/2018_Annual_Report/</a>                                                                                                                                                                            | 9-15-2019          |
| North Dakota  | "Filings" of "civil commitment cases"                                                                                                                                                                                                                                 | North Dakota Court System Annual Reports. Calendar years 2011-2018. Counts are calculated from information in reports, i.e., for 2018, percentage of civil commitment cases was "8.0%" of "20,758 other civil cases" and "decreased by 18 cases or 1.1% as compared to 2017," etc.<br><a href="https://www.ndcourts.gov/state-court-administration/annual-report">https://www.ndcourts.gov/state-court-administration/annual-report</a> | 9-15-2019          |



| State        | Terms for detention and/or commitment procedures given by data source, and classification into "Emergency" or "Longer-term commitment" if available                                                                                    | Data source, URL, notes                                                                                                                                                                                                                                                                                                                       | Date last accessed |
|--------------|----------------------------------------------------------------------------------------------------------------------------------------------------------------------------------------------------------------------------------------|-----------------------------------------------------------------------------------------------------------------------------------------------------------------------------------------------------------------------------------------------------------------------------------------------------------------------------------------------|--------------------|
| Oklahoma     | <u>Emergency</u> : "Emergency detention"<br><u>Longer-term commitment</u> : "Court commitment"                                                                                                                                         | Data received on an Excel spreadsheet via email on October 4, 2017 from Oklahoma Department of Mental Health and Substance Abuse Services. Source states that data are collected from state hospitals.                                                                                                                                        | Not applicable     |
| Oregon       | "Civil commitment cases filed" in circuit courts                                                                                                                                                                                       | Circuit Court Case Statistics. Calendar years 2016 to 2018. Oregon Judicial Branch.<br><a href="https://www.courts.oregon.gov/about/Pages/reports-measures.aspx">https://www.courts.oregon.gov/about/Pages/reports-measures.aspx</a><br><br>From 2011 to 2015, data refer only to "mental health" with no other definition and were excluded. | 9-1-2019           |
| South Dakota | "Filings" of "mental illness & drug & alcohol commitment" cases in circuit and magistrate courts                                                                                                                                       | Annual Statistical Report of the South Dakota Unified Judicial System, Circuit and Magistrate Court. Fiscal years 2011 to 2018, South Dakota Unified Judicial System.<br><a href="http://ujis.sd.gov/Information/annualreports.aspx">http://ujis.sd.gov/Information/annualreports.aspx</a>                                                    | 9-1-2019           |
| Texas        | <u>Emergency</u> : "New applications filed for temporary mental health services, or commitment for not longer than 90 days"<br><u>Longer-term commitment</u> : A disposition of "commit — inpatient" granted at "final hearing" (after | Annual Statistical Report for the Texas Judiciary. Fiscal years 2011 to 2018. Texas Office of Court Administration.<br><a href="http://www.txcourts.gov/statistics/annual-statistical-reports/">http://www.txcourts.gov/statistics/annual-statistical-reports/</a><br><br>Emergency counts also include a smaller number,                     | 9-1-2019           |

| State   | Terms for detention and/or commitment procedures given by data source, and classification into "Emergency" or "Longer-term commitment" if available                                       | Data source, URL, notes                                                                                                                                                                                                                                                                                                                                                                                                                                                                                                                                                                                                                                                                                                     | Date last accessed |
|---------|-------------------------------------------------------------------------------------------------------------------------------------------------------------------------------------------|-----------------------------------------------------------------------------------------------------------------------------------------------------------------------------------------------------------------------------------------------------------------------------------------------------------------------------------------------------------------------------------------------------------------------------------------------------------------------------------------------------------------------------------------------------------------------------------------------------------------------------------------------------------------------------------------------------------------------------|--------------------|
|         | "probable cause hearing") for applications filed for temporary and extended mental health services                                                                                        | ~50 to ~250 across 2011-2018, of "new applications filed" for "extended mental health services, or commitment for greater than 90 days, but not longer than 12 months."                                                                                                                                                                                                                                                                                                                                                                                                                                                                                                                                                     |                    |
| Utah    | "Case filings" of "invol. commitment MH" in district courts                                                                                                                               | Utah District Courts: FY2018 Case Type by Court. Fiscal years 2011 to 2018. Utah Courts<br><a href="https://www.utcourts.gov/stats/?stats=previous">https://www.utcourts.gov/stats/?stats=previous</a>                                                                                                                                                                                                                                                                                                                                                                                                                                                                                                                      | 9-1-2019           |
| Vermont | <u>Emergency</u> : "Emergency (civil) admissions"<br><u>Longer-term commitment</u> : "Involuntary admissions...admitted to inpatient care" in state-run hospital and designated hospitals | Vermont 2019, Reforming Vermont's Mental Health System, Report to the Legislature on the Implementation of Act 79. Vermont Department of Mental Health, Agency of Human Services.<br><a href="https://mentalhealth.vermont.gov/sites/mhnew/files/documents/Reports/2019-ACT_79_FINAL_REPORT_011519.pdf">https://mentalhealth.vermont.gov/sites/mhnew/files/documents/Reports/2019-ACT_79_FINAL_REPORT_011519.pdf</a><br><br>Emergency counts are estimated from Chart 11 (p. 21) and commitment counts from Chart 9 (p. 19) of the data source.<br>Source states that data are collected from the one state-run inpatient facility or the five hospitals throughout the state designated to receive involuntary admissions. | 9-1-2019           |

| State      | Terms for detention and/or commitment procedures given by data source, and classification into "Emergency" or "Longer-term commitment" if available                          | Data source, URL, notes                                                                                                                                                                                                                                                                                                                                                                                                                                                                                                                                                                                                                                                                                                                                                                                                                                                                                                                                                                                                                                                                                                                                                                                                                                                                                                                              | Date last accessed |
|------------|------------------------------------------------------------------------------------------------------------------------------------------------------------------------------|------------------------------------------------------------------------------------------------------------------------------------------------------------------------------------------------------------------------------------------------------------------------------------------------------------------------------------------------------------------------------------------------------------------------------------------------------------------------------------------------------------------------------------------------------------------------------------------------------------------------------------------------------------------------------------------------------------------------------------------------------------------------------------------------------------------------------------------------------------------------------------------------------------------------------------------------------------------------------------------------------------------------------------------------------------------------------------------------------------------------------------------------------------------------------------------------------------------------------------------------------------------------------------------------------------------------------------------------------|--------------------|
| Virginia   | <p><u>Emergency</u>: "Temporary detention orders" ("72-hour detention")</p> <p><u>Longer-term commitment</u>: "Involuntary commitment orders issued at initial hearings"</p> | <p>Figures for adults: Faris KM, Allen AA, and Ko TM: Annual Statistical Report: Adult Civil Commitment Proceedings in Virginia FY 2017. University of Virginia Institute of Law, Psychiatry, and Public Policy.<br/> <a href="https://uvamentalhealthpolicy.org/documents/2018/1/25/annual-statistical-report-adult-civil-commitment-proceedings-in-virginia-fy-2017">https://uvamentalhealthpolicy.org/documents/2018/1/25/annual-statistical-report-adult-civil-commitment-proceedings-in-virginia-fy-2017</a></p> <p>Figures for minors (emergency only): Allen AA and Bonnie JK: Annual Statistical Report: Civil Commitment of Minors in Virginia (FY 2010 - FY 2015). University of Virginia Institute of Law, Psychiatry, and Public Policy.<br/> <a href="https://uvamentalhealthpolicy.org/documents/2018/2/2/annual-statistical-report-civil-commitment-of-minors-in-virginia-fy-2010-fy-2015?rq=annual">https://uvamentalhealthpolicy.org/documents/2018/2/2/annual-statistical-report-civil-commitment-of-minors-in-virginia-fy-2010-fy-2015?rq=annual</a></p> <p>Sources state that data for adults and children are collected by court clerks using the General District Court Case Management System and the Juvenile Case Management System, respectively, and for both age groups by magistrates using the eMagistrate System.</p> | 11-22-2019         |
| Washington | <p><u>Emergency</u>: "Detention to inpatient MH facility (72 hours)"</p>                                                                                                     | <p>Burley M, Nicolai C, Miller M: Washington's Involuntary Treatment Act: Use of Non-emergent</p>                                                                                                                                                                                                                                                                                                                                                                                                                                                                                                                                                                                                                                                                                                                                                                                                                                                                                                                                                                                                                                                                                                                                                                                                                                                    | 9-1-2019           |

| State     | Terms for detention and/or commitment procedures given by data source, and classification into "Emergency" or "Longer-term commitment" if available                                            | Data source, URL, notes                                                                                                                                                                                                                                                                                                                                                                                                                                                                                                                                                                                                                                                                                                                                                                                                                                                                                                                                                                                                                       | Date last accessed |
|-----------|------------------------------------------------------------------------------------------------------------------------------------------------------------------------------------------------|-----------------------------------------------------------------------------------------------------------------------------------------------------------------------------------------------------------------------------------------------------------------------------------------------------------------------------------------------------------------------------------------------------------------------------------------------------------------------------------------------------------------------------------------------------------------------------------------------------------------------------------------------------------------------------------------------------------------------------------------------------------------------------------------------------------------------------------------------------------------------------------------------------------------------------------------------------------------------------------------------------------------------------------------------|--------------------|
|           | <p><u>Longer-term commitment</u>: "Order for 14-day inpatient commitment, followed by LRA [least restrictive alternative] order" and "order for 14-day inpatient commitment, no LRA order"</p> | <p>Petitions and Less Restrictive Alternatives to Treatment. Washington State Institute for Public Policy, December 2015.<br/> <a href="https://www.wsipp.wa.gov/ReportFile/1619/Wsipp-Washingtons-Involuntary-Treatment-Act-Use-of-Non-Emergent-Petitions-and-Less-Restrictive-Alternatives-to-Treatment_Report.pdf">https://www.wsipp.wa.gov/ReportFile/1619/Wsipp-Washingtons-Involuntary-Treatment-Act-Use-of-Non-Emergent-Petitions-and-Less-Restrictive-Alternatives-to-Treatment_Report.pdf</a></p> <p>Emergency counts are estimated from bar chart in Exhibit 1 (p. 4), and commitment refers to counts from Exhibit 6 for years 2011-2014 p. 10) and Exhibit A3 for 2014 in detail (p. 22). Source indicates that data on emergency detentions are obtained from Washington State Division of Behavioral Health and Recovery Service Encounter Reporting Database, and data for commitment are obtained from Washington State Administrative Office of the Courts Judicial Information System and Pierce County Clerk's Office.</p> |                    |
| Wisconsin | <p>"Opened" cases of "mental commitments" and "alcohol commitments" and "drug commitments" in circuit courts</p>                                                                               | <p>Probate Disposition Summary by Disposing Court Official Statewide Report. Calendar years 2011 to 2018. Wisconsin Court System.<br/> <a href="https://www.wicourts.gov/publications/statistics/circuit/circuitstats.htm">https://www.wicourts.gov/publications/statistics/circuit/circuitstats.htm</a></p>                                                                                                                                                                                                                                                                                                                                                                                                                                                                                                                                                                                                                                                                                                                                  | 9-1-2019           |
